# Supplementary material
Source: HighWire-hosted journal article supplement (http://molpharm.aspetjournals.org/highwire/filestream/76908/field_highwire_adjunct_files/1/SI_fig_2.pdf)
Supplement: SI_fig_2.pdf [file SI_fig_2.pdf]

## Glycine hinges with opposing actions at the acetylcholine receptor-channel transmitter binding site

Prasad Purohit and Anthony Auerbach

Department of Physiology and Biophysics, SUNY at Buffalo, Buffalo 14214, USA

**Molecular Pharmacology**

### Supplemental Figure 2

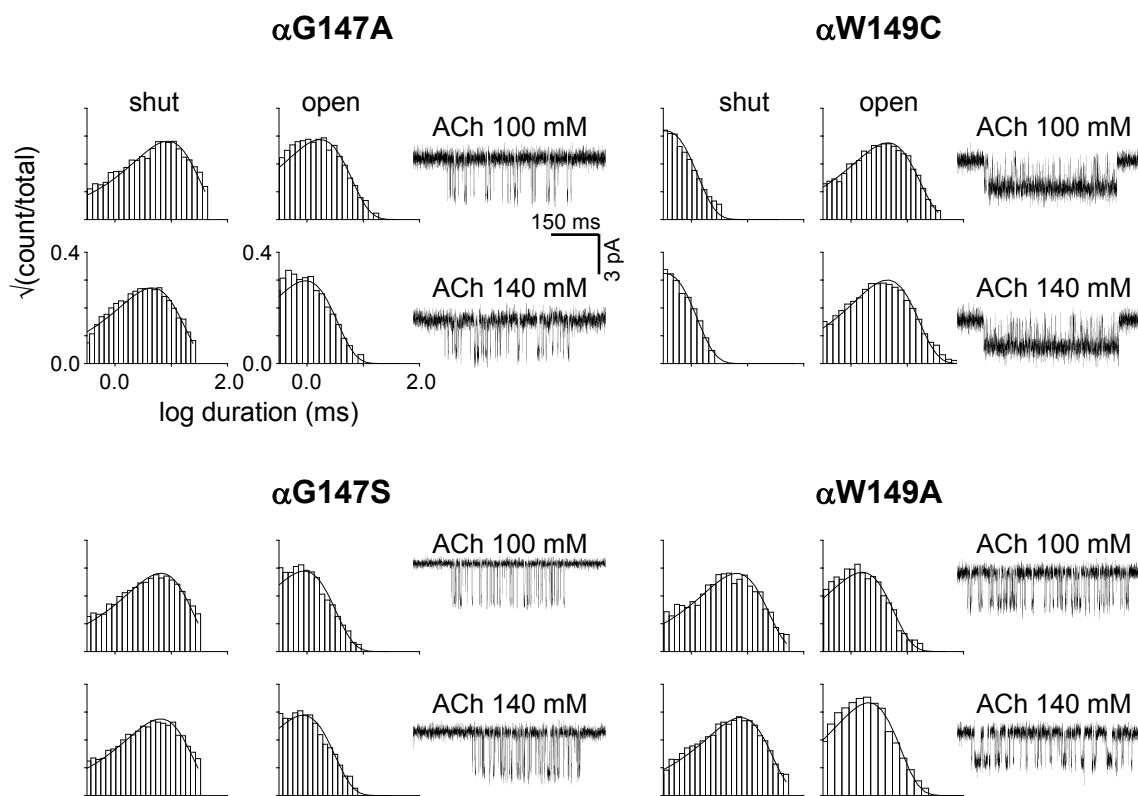

**Supplemental Figure 2.** Example traces and shut/open histograms of loop B mutants  $\alpha$ G147A,  $\alpha$ G147S,  $\alpha$ W149C and  $\alpha$ W149A. Full saturation of the binding site was ensured by measuring forward/backward rates and equilibrium constants at two different ACh concentrations (100 and 140 mM). Similar rate constants at both concentrations indicate that the binding sites were saturated.
